# Supplementary material for: The IL1β-IL1R signaling is involved in the stimulatory effects triggered by hypoxia in breast cancer cells and cancer-associated fibroblasts (CAFs)
Source: Springer Nature journal article supplement (doi:10.1186/s13046-020-01667-y), 2020-08-10
Supplement: MOESM1 [file 18263172]

**Additional File 1.** The top 250 genes correlated with HIF-1 $\alpha$  in the TCGA dataset were clustered using the KEGG pathway enrichment analysis. The HIF-1 $\alpha$  correlated genes belonging to the “Cytokine-cytokine receptor interaction” pathway were reported according to their correlation coefficients (p-value < 0.001).

| <b>Gene</b>  | <b>r-value</b> | <b>p-value</b> |
|--------------|----------------|----------------|
| OSMR         | 0.52           | 7.04E-10       |
| IL1RAP       | 0.48           | 1.54E-08       |
| IL-1 $\beta$ | 0.44           | 3.03E-07       |
| IL7R         | 0.44           | 3.44E-07       |
| TGFBR2       | 0.43           | 5.40E-07       |
| IL1R1        | 0.43           | 5.56E-07       |
| IL1A         | 0.42           | 1.36E-06       |
| IL6ST        | 0.41           | 2.30E-06       |
| INHBA        | 0.41           | 2.40E-06       |
| IL6          | 0.41           | 2.63E-06       |
