# Supplementary material for: The IL1β-IL1R signaling is involved in the stimulatory effects triggered by hypoxia in breast cancer cells and cancer-associated fibroblasts (CAFs)
Source: Springer Nature journal article supplement (doi:10.1186/s13046-020-01667-y), 2020-08-10

**Additional File 2.** Immunoblots of HIF-1 $\alpha$  in MDA-MB-231 cells exposed to IL-1 $\beta$  (10 ng/mL), as indicated. Side panel shows densitometric analysis of the blot normalized to  $\beta$ -actin. Values represent the mean  $\pm$  SD of three independent experiments performed in triplicate. (\*)  $p < 0.05$ .

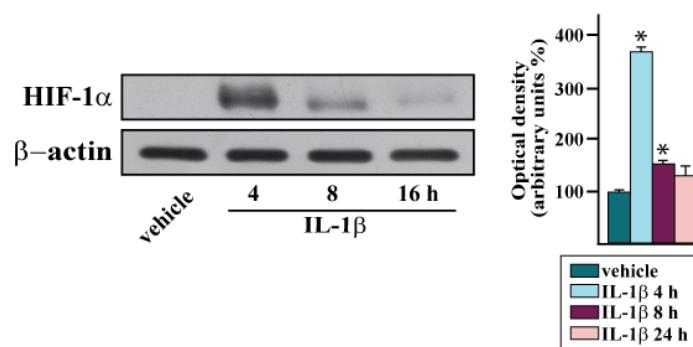

Supplement: MOESM2 [file 18263172]
