# Supplementary material for: The IL1β-IL1R signaling is involved in the stimulatory effects triggered by hypoxia in breast cancer cells and cancer-associated fibroblasts (CAFs)
Source: Springer Nature journal article supplement (doi:10.1186/s13046-020-01667-y), 2020-08-10
Supplement: MOESM3 [file 18263172]

**Additional File 3.** Pro-metastatic gene expression changes upon hypoxia or IL1 $\beta$  in the presence of IL1R1a respect to values set as one-fold induction of cells cultured respectively under normoxia or treated with vehicle.

| <b>Gene</b>  | <b>Hypoxia (fold changes)</b> | <b>IL-1<math>\beta</math> (fold changes)</b> |
|--------------|-------------------------------|----------------------------------------------|
| PTGS2 (COX2) | 11.38                         | 9.08                                         |
| IL-1 $\beta$ | 10.81                         | 7.16                                         |
| VEGFA        | 4.81                          | 1.41                                         |
| MMP9         | 4.43                          | 2.92                                         |
| MMP3         | 4.34                          | 3.19                                         |
| SERPINE1     | 4.16                          | 2.50                                         |
| TPBG         | 3.41                          | 1.29                                         |
| MMP1         | 2.84                          | 1.46                                         |
| CD44         | 2.25                          | 2.40                                         |
| MYC          | 2.13                          | 1.46                                         |
| CTSK         | 1.70                          | 1.33                                         |
