# Supplementary material for: The IL1β-IL1R signaling is involved in the stimulatory effects triggered by hypoxia in breast cancer cells and cancer-associated fibroblasts (CAFs)
Source: Springer Nature journal article supplement (doi:10.1186/s13046-020-01667-y), 2020-08-10

**Additional File 4.** Immunoblots of IL-1 $\beta$  and COX2 in CAFs exposed to conditioned medium (CM) collected from MDA-MB-231 cells cultured upon normoxia or hypoxia (2% O<sub>2</sub>), in the presence or absence of a neutralizing IL-1 $\beta$  antibody (140 ng/mL). Side panel shows densitometric analysis of the blots normalized to  $\beta$ -actin. Values represent the mean  $\pm$  SD of three independent experiments performed in triplicate. (\*)  $p < 0.05$ .

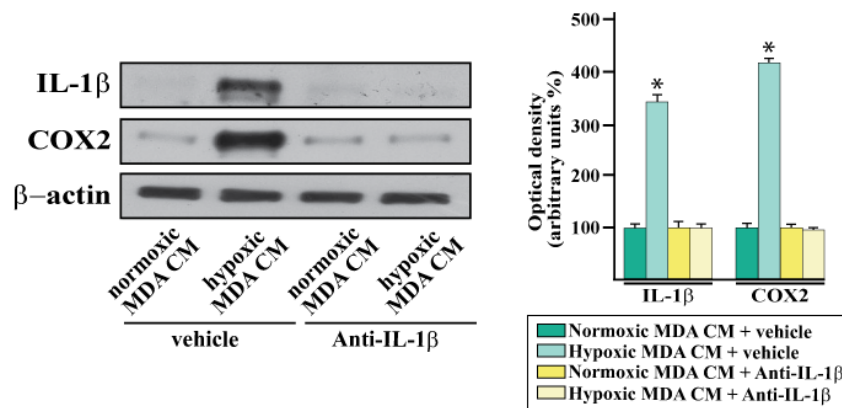

Supplement: MOESM4 [file 18263172]
